# Supplementary material
Source: PubMed Central journal article supplement (PMC2973891)
Supplement: 1007028107_pnas.201007028SI.pdf [file 1007028107_pnas.201007028SI.pdf]

# Supporting Information

Benson et al. 10.1073/pnas.1007028107

## SI Methods

**Pyrosequencing.** The V1-V2 region of the 16S rRNA gene was amplified using bar-coded fusion primers with the Roche-454 A or B titanium sequencing adapters (in italics), followed by a unique 8-base barcode sequence (B) and finally the 5' ends of primer A-8FM (5'-*CCATCTCATCCCTGCGTGTCTCCGACTCAGB-BBBBBBAGAGTTTGATCMTGGCTCAG*) and of primer B-357R (5'-*CCTATCCCCTGTGTGCCTT-GGCAGTCTCAGB-BBBBBBCTGCTGCCTYCCGTA-3'*). All PCR reactions were quality- controlled for amplicon saturation by gel electrophoresis; band intensity was quantified against standards using GeneTools software (Syngene). For each region of a two-region picotiter plate, amplicons from 48 reactions were pooled in equal amounts and gel-purified. The resulting products were quantified using PicoGreen (Invitrogen) and a Qubit fluorometer (Invitrogen) before sequencing using Roche-454 GS FLX titanium chemistry.

**Data Processing Pipeline.** The raw data from the 454 pyrosequencing machine were first processed through a quality filter that removed unqualified sequence reads that did not meet the following criteria:

1. A complete forward primer and barcode
2.  $\leq 2$  "N" in a sequence read, where N is equivalent to an interrupted and resumed signals from sequential flows
3.  $200 \text{ nt} \leq \text{sequence length} \leq 500 \text{ nt}$
4. Average quality score  $\geq 20$ .

After filtering, each read was trimmed to remove 3' adapter and primer sequences and was parsed by barcode. The corresponding .QUAL file also was updated to remove quality scores from reads not passing quality filters. The files are associated with sample information in a hierarchical manner in MySQL tables. The processed data and the MySQL database tables are stored on a database server and available to the public at <http://cage.unl.edu>.

Given the massive size of the pyrosequencing data set and the need to normalize the taxonomy across the entire data set in a hierarchical fashion, a limited number of current algorithms could be modified and implemented. The CLASSIFIER algorithm assigns taxonomic status to each sequence read based on a covariance model developed from a training set (1). This algorithm is capable of processing very large data sets and was recently shown to provide adequate taxonomic assignments to pyrosequencing data (2). We implemented a parallelized version of the CLASSIFIER (kindly provided by the Center for Microbial Ecology, Ribosomal Database Project at Michigan State University), using the standard threshold of 0.8, with reads classified down to the lowest level until the score  $< 0.8$ , at which point reads are classified as "unclassified" at the next-higher taxonomic rank.

The hierarchical output data from the CLASSIFIER were further processed by computing the absolute proportion of each sequence, calculated as

$$\text{absolute proportion} = \frac{\text{\#reads of a taxon}}{\text{total number of reads in a sample}}$$

The absolute proportion is referred to as the Prop value. The multi-CLASSIFIER algorithm, proportion calculation, and assembly of the Prop table for the entire data set were performed sequentially on a Linux cluster of computer nodes, with the jobs controlled by the PBS portable batch system. The data were partitioned into a number of smaller groups, and the calculations were computed independently in a cluster node for each group, with the final results compiled when all were complete. At a threshold of 0.8, the data from all 645 animals in our data set included 420 different genera, 143 families, 53 orders, 24 classes, and 16 phyla that contained at least one assigned sequence. Of the 420 observed genera, 47 genera accounted for  $>99\%$  of the sequences, and 19 accounted for  $>90\%$  of the sequences.

To test the robustness of the CLASSIFIER algorithm, we compared the CLASSIFIER-based taxonomic assignments to the RDP database using SEQMATCH. Samples of 40,000 sequences assigned to one of several representative taxa were chosen and compared with the RDP database using the SEQMATCH program. Results for the top hits were compiled and are reported in Table S1.

**Details of the QTL Analysis.** QTL analyses generated  $P$  values for the original population and the GRAIP-permuted populations ( $n = 50,000$ ); these were performed on log-transformed traits using the multiple-imputation method (3) within R/qtl (4). Statistical models included parent-of-origin type [i.e., whether a  $G_4$  individual was descended from a progenitor ( $F_0$ ) cross  $HR\varnothing \times B6\sigma$  or  $B6\varnothing \times HR\sigma$ , coded as 1 or 0, respectively] and parity (i.e., order of litters from individual  $F_3$  dams). The X chromosome was treated as an autosome, because R/qtl assumes a  $F_2$  population and requires the identity of the cross direction. The output from R/qtl was then used to calculate locus-specific  $P$  values as described previously (5). Locus-specific  $P$  values were calculated for each marker of the original data set, using the value of that specific marker in each of the permuted maps at each locus as a null distribution. The null distribution for each marker was compared with the value for the original  $G_4$  mapping data set to generate locus-specific  $P$  values at marker positions. These  $P$  values were interpolated onto the genome based on known physical positions of markers and placed on a scaffold at regular physical intervals. Finally, genome-wide, adjusted  $P$  values were computed by creating an ordered list of the minimum possible  $P$  values (or highest  $-\log P$ , LOD) from each GRAIP-permuted map. Because we used 50,000 permutations, the minimum possible  $P$  value was 0.00002 (1/50,000) and the maximum  $-\log P$  was 4.7. The 95th percentile ( $P = 0.05$ ;  $\text{LOD} \geq 3.9$ ) and 90th percentile ( $P = 0.1$ ;  $\text{LOD} \geq 3.5$ ) defined significant and suggestive loci, respectively. Confidence intervals were approximated by 1 LOD drop support intervals (relative to the GRAIP-permuted LOD score). Standard linear regression was used to estimate the percent variation by fitting the imputed QTL marker genotypes; the additive and dominance QTL effects were calculated using R/qtl.

1. Wang Q, Garrity GM, Tiedje JM, Cole JR (2007) Naive Bayesian classifier for rapid assignment of rRNA sequences into the new bacterial taxonomy. *Appl Environ Microbiol* 73:5261–5267.
2. Liu Z, DeSantis TZ, Andersen GL, Knight R (2008) Accurate taxonomy assignments from 16S rRNA sequences produced by highly parallel pyrosequencers. *Nucleic Acids Res* 36:e120.
3. Sen S, Churchill GA (2001) A statistical framework for quantitative trait mapping. *Genetics* 159:371–387.

4. Broman KW, Wu H, Sen S, Churchill GA (2003) R/qtl: QTL mapping in experimental crosses. *Bioinformatics* 19:889–890.
5. Peirce JL, et al. (2008) Genome Reshuffling for Advanced Intercross Permutation (GRAIP): Simulation and permutation for advanced intercross population analysis. *PLoS One* 3:e1977.
6. Walter J, et al. (2001) Detection of *Lactobacillus*, *Pediococcus*, *Leuconostoc*, and *Weissella* species in human feces by using group-specific PCR primers and denaturing gradient gel electrophoresis. *Appl Environ Microbiol* 67:2578–2585.

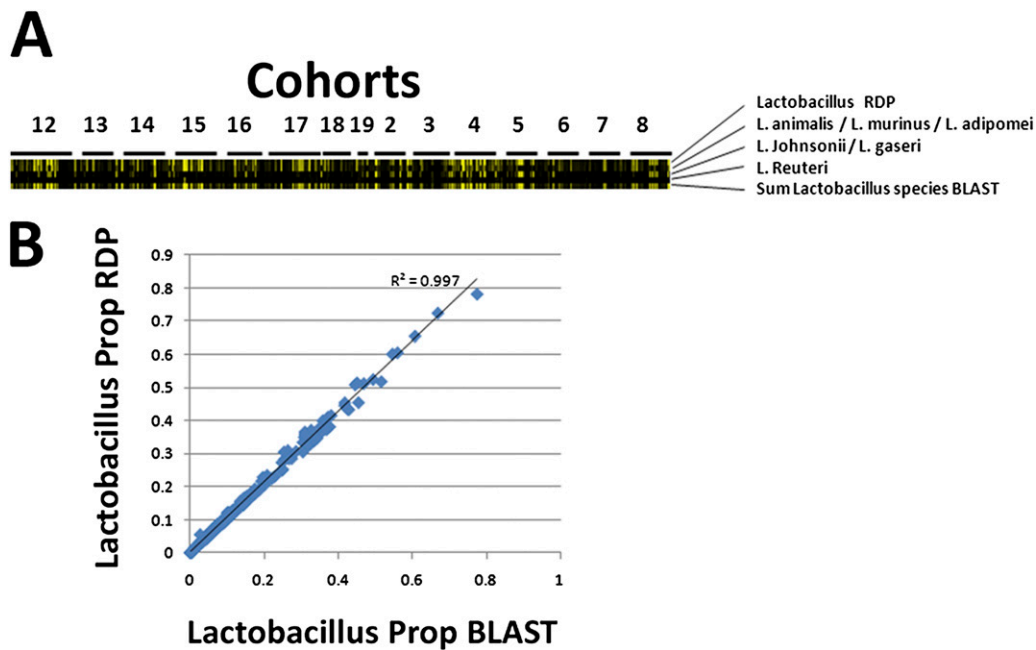

**Fig. S1.** BLAST Analysis of *Lactobacillus* species. To analyze the *Lactobacillus* at the species level, Bioedit v7.0.9 was used to perform a local nucleotide BLAST (blastn) search using the murine *Lactobacillus* type strain sequences: *L. animalis* (AB326350.1), *L. apodemi* (AJ871178.1), *L. murinus* (AB326349.1), *L. reuteri* (CP000705.1), *L. gaseri* (CP000413.1), and *L. johnsonii* (ACGR01000047.1). These sequences were trimmed to ~340 nucleotides to match the length of the V1-V2 amplicons and used as queries against entire sets of read sequences from each sample with a 97% identity threshold for species assignment. The number of each *Lactobacillus* species hits for each sample was then divided by the total number of reads and used as the Prop value for the sample. (A) A heat map depicting the relative abundance of BLAST hit distribution for the species groups of *L. animalis/murinus*, *L. johnsonii/gaseri*, and *L. reuteri*. The top row depicts the relative abundance of the genus *Lactobacillus* from the CLASSIFIER algorithm, and the bottom row shows the pooled cumulative Prop for BLAST hits of all three species groups. (B) A scatterplot of relative Prop of *Lactobacillus* from the RDP CLASSIFIER versus the cumulative Prop of the *Lactobacillus* species groups from the BLAST analysis.

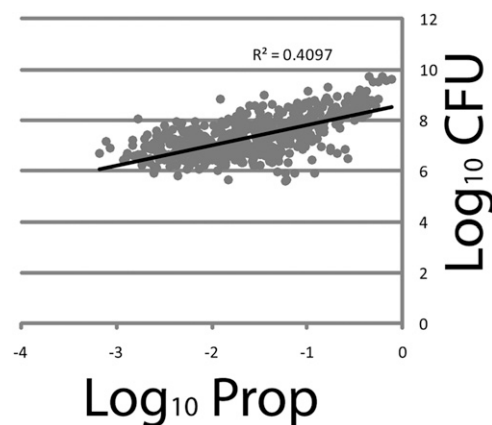

**Fig. S2.** Correlation between pyrosequencing and qPCR estimates for *Lactobacillus* in the G<sub>4</sub> AIL population. To quantify organisms in the Lactobacilli group, real-time qPCR was performed using a Mastercycler ep *realplex* (Eppendorf) and the group-specific primers Lac1 and Lac2 described previously (6). The primers target the 16S rDNA of *Lactobacillus* spp., *Pediococcus* spp., *Leuconostoc* spp., and *Weissella* spp., and result in a product length of 340 bp. The reaction mixture (25  $\mu$ L) consisted of 1 $\times$  QuantiFast SYBR Green PCR Master Mix (Qiagen), 25 pmol of each primer, template DNA, and RNase-free water. The amplification program was an initial denaturation at 94  $^{\circ}$ C for 2 min, followed by 35 cycles of denaturation at 94  $^{\circ}$ C for 30 s, annealing at 61  $^{\circ}$ C for 1 min, and extension at 68  $^{\circ}$ C for 1 min. A melting curve analysis was performed after each run. Standard curves were generated from 10-fold serial dilutions of DNA extracted from pure cultures of *L. reuteri* (DSM 20016<sup>T</sup>) and *L. gaseri* (ATCC 33323<sup>T</sup>). A plot of the threshold cycles ( $C_t$ ) vs. bacterial counts (CFU/mL) resulted in a linear relationship with a correlation coefficient ( $r$ ) of  $-0.989$  ( $R^2 = 0.98$ ). The total number of bacteria (CFU/g) for each stool sample was determined by interpolation of the standard curve. Both standards and samples were run in duplicate, and the counts were averaged. To measure the linear relationship between pyrosequencing and qPCR, a correlation analysis was performed on the amount of bacteria quantified by each method. Specifically, the bacterial counts (in log<sub>10</sub> CFU/mL) obtained by qPCR was plotted against the log<sub>10</sub> proportion of *Lactobacillus*, *Leuconostoc*, *Pediococcus*, and *Weissella* reads over the total reads for each sample. A significant correlation ( $P < 0.0001$ ) was obtained, with  $r = 0.625$ .

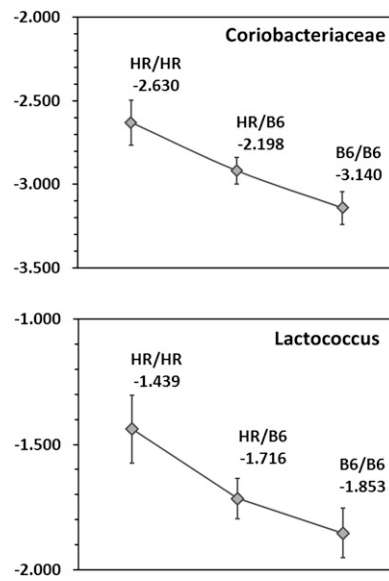

**Fig. S3.** Association of alleles at the JAX0030095 marker on MMU10 with the relative abundance of Coriobacteriaceae and *Lactococcus*. The log10-transformed Prop values for the family Coriobacteriaceae and the genus *Lactococcus* were averaged for each combination of JAX0030095 alleles. Alleles and the average log10-transformed Prop values are indicated above the relevant data points. Error bars indicate 2 SDs.

**Table S1. SEQMATCH best hits of selected taxonomic bins from CLASSIFIER output**

| Taxonomic rank | Taxa*                                       | Top organisms <sup>†</sup>                                                         | Taxa represented <sup>†</sup> | Counts <sup>§</sup> | Prop total <sup>  </sup> | Prop top hits** | Average S_ab score <sup>††</sup> |
|----------------|---------------------------------------------|------------------------------------------------------------------------------------|-------------------------------|---------------------|--------------------------|-----------------|----------------------------------|
| Genus          | <i>Variovorax</i><br>40k <sup>**</sup>      | <i>Variovorax paradoxus</i> ; Iso1; AY127900                                       | <i>Variovorax</i>             | 15,303              | 0.382575                 | 0.4481244       | 0.9253395                        |
|                |                                             | <i>Variovorax</i> sp. TUT1027; AB098595                                            | <i>Variovorax</i>             | 10,450              | 0.26125                  | 0.3060119       | 0.9306991                        |
|                |                                             | Uncultured eubacterium WD2115; AJ292627                                            | <i>Variovorax</i>             | 4,424               | 0.1106                   | 0.1295499       | 0.9046336                        |
|                |                                             | <i>Variovorax paradoxus</i> S110; CP001635                                         | <i>Variovorax</i>             | 3,972               | 0.0993                   | 0.1163138       | 0.9478978                        |
|                |                                             |                                                                                    |                               | <b>34,149</b>       | <b>0.853725</b>          |                 |                                  |
| Genus          | <i>Helicobacter</i><br>46k <sup>**</sup>    | <i>Helicobacter ganmani</i> ; ES-5; AY561831                                       | <i>Helicobacter</i>           | 38,664              | 0.840522                 | 0.8623043       | 0.8908472                        |
|                |                                             | <i>Helicobacter hepaticus</i> ; AJ007931                                           | <i>Helicobacter</i>           | 4,944               | 0.107478                 | 0.1102636       | 0.8031028                        |
|                |                                             | Uncultured bacterium; L-123; EU622666                                              | <i>Helicobacter</i>           | 646                 | 0.014043                 | 0.0144074       | 0.8069954                        |
|                |                                             | Uncultured bacterium; MD2_aap36e09; EU508632                                       | <i>Helicobacter</i>           | 584                 | 0.012696                 | 0.0130247       | 0.928738                         |
|                |                                             |                                                                                    |                               | <b>44,838</b>       | <b>0.974739</b>          |                 |                                  |
| Genus          | <i>Bacteroides</i><br>52k <sup>**</sup>     | <i>Bacteroides acidifaciens</i> ; AB021157                                         | <i>Bacteroides</i>            | 6,672               | 0.128308                 | 0.3118048       | 0.8855073                        |
|                |                                             | Uncultured bacterium; SWPT13_aaa01g04; EF096855                                    | <i>Bacteroides</i>            | 6,455               | 0.124135                 | 0.3016637       | 0.8953075                        |
|                |                                             | Uncultured bacterium; HY1_h06_1; EU458381                                          | <i>Odoribacter</i>            | 4,220               | 0.081154                 | 0.1972147       | 0.7443513                        |
|                |                                             | Uncultured bacterium; K80N2_04b08; EU454172                                        | <i>Bacteroides</i>            | 4,051               | 0.077904                 | 0.1893168       | 0.906758                         |
|                |                                             |                                                                                    |                               | <b>21,398</b>       | <b>0.4115</b>            |                 |                                  |
| Genus          | <i>Parabacteroides</i><br>40k <sup>**</sup> | Uncultured bacterium; lean2_aaa01f09; EF096000                                     | <i>Parabacteroides</i>        | 17,825              | 0.445625                 | 0.6227509       | 0.8851896                        |
|                |                                             | Uncultured bacterium; SJTU_A2_04_88; EF403654                                      | <i>Parabacteroides</i>        | 4,034               | 0.10085                  | 0.1409356       | 0.9071552                        |
|                |                                             | Uncultured bacterium; RL246_aai73h07; DQ793582                                     | <i>Parabacteroides</i>        | 3,733               | 0.093325                 | 0.1304196       | 0.9290656                        |
|                |                                             | Uncultured bacterium; WF165_154; EU939416                                          | <i>Parabacteroides</i>        | 3,031               | 0.075775                 | 0.1058939       | 0.9160894                        |
|                |                                             |                                                                                    |                               | <b>28,623</b>       | <b>0.715575</b>          |                 |                                  |
| Genus          | <i>Marinilabilia</i><br>40k <sup>**</sup>   | Uncultured bacterium; HD5++50; EU791010                                            | <i>Barnesiella</i>            | 10,475              | 0.261875                 | 0.5164423       | 0.8619934                        |
|                |                                             | Uncultured bacterium; nbt15e03; FJ893065                                           | <i>Barnesiella</i>            | 6,548               | 0.1637                   | 0.3228319       | 0.8312596                        |
|                |                                             | Uncultured bacterium; mbc135; AM932661                                             | <i>Odoribacter</i>            | 1,842               | 0.04605                  | 0.090815        | 0.7321471                        |
|                |                                             | Uncultured bacterium; C20_j04; AY991881                                            | <i>Odoribacter</i>            | 1,418               | 0.03545                  | 0.0699108       | 0.8218131                        |
|                |                                             |                                                                                    |                               | <b>20,283</b>       | <b>0.507075</b>          |                 |                                  |
| Genus          | <i>Alistipes</i><br>40k <sup>**</sup>       | Uncultured bacterium; WD3_aak03b12; EU510226                                       | <i>Alistipes</i>              | 8,234               | 0.20585                  | 0.2924006       | 0.8541191                        |
|                |                                             | Uncultured bacterium; cc_74; GQ175415                                              | <i>Alistipes</i>              | 7,759               | 0.193975                 | 0.2755327       | 0.8011231                        |
|                |                                             | Uncultured bacterium; WD4_aal37e01; EU510373                                       | <i>Alistipes</i>              | 7,640               | 0.191                    | 0.2713068       | 0.8777465                        |
|                |                                             | Uncultured bacterium; 16saw34-1g01.w2k; EF603689                                   | <i>Alistipes</i>              | 4,527               | 0.113175                 | 0.1607599       | 0.8833928                        |
|                |                                             |                                                                                    |                               | <b>28,160</b>       | <b>0.704</b>             |                 |                                  |
| Genus          | <i>Rikenella</i><br>42k <sup>**</sup>       | Uncultured bacterium; WD3_aak01e03; EU510108                                       | Unclassified<br>Bacteroidales | 30,563              | 0.72769                  | 0.8172799       | 0.8550692                        |
|                |                                             | Uncultured bacterium; C21_e10; AY993107                                            | Unclassified<br>Bacteroidales | 2,858               | 0.068048                 | 0.0764253       | 0.8142789                        |
|                |                                             | Uncultured bacterium; cc_96; GQ175429                                              | <i>Rikenella</i>              | 2,277               | 0.054214                 | 0.0608889       | 0.6285806                        |
|                |                                             | Uncultured bacterium; 2.16F; EU655924                                              | Unclassified<br>Bacteroidales | 1,698               | 0.040429                 | 0.0454059       | 0.7522668                        |
|                |                                             |                                                                                    |                               | <b>37,396</b>       | <b>0.890381</b>          |                 |                                  |
| Family         | Peptostreptococaceae<br>44k <sup>**</sup>   | Uncultured bacterium; R-9612; FJ880565                                             | <i>Sporacetigenium</i>        | 14,429              | 0.327932                 | 0.5388982       | 0.8899369                        |
|                |                                             | Uncultured bacterium; MD23_2aaa04g05; EU507538                                     | <i>Sporacetigenium</i>        | 5,811               | 0.132068                 | 0.2170308       | 0.9109019                        |
|                |                                             | Uncultured bacterium; MD18_aaa01c10; EU506158                                      | <i>Sporacetigenium</i>        | 4,063               | 0.092341                 | 0.151746        | 0.9240386                        |
|                |                                             | Uncultured bacterium; MD19_aaa01c03; EU506401                                      | <i>Sporacetigenium</i>        | 2,472               | 0.056182                 | 0.0923249       | 0.897591                         |
|                |                                             |                                                                                    |                               | <b>26,775</b>       | <b>0.608523</b>          |                 |                                  |
| Genus          | <i>Lactococcus</i><br>40k <sup>**</sup>     | <i>Lactococcus lactis</i> subsp. <i>cremoris</i> ; YIT 2007 (ATCC 19257); AB008214 | <i>Lactococcus</i>            | 10,278              | 0.25695                  | 0.3364982       | 0.8874481                        |
|                |                                             | <i>Lactococcus lactis</i> subsp. <i>cremoris</i> SK11; CP000425                    | <i>Lactococcus</i>            | 8,971               | 0.224275                 | 0.2937074       | 0.8944487                        |
|                |                                             | Uncultured bacterium; 1-5D; EU289440                                               | <i>Lactococcus</i>            | 6,533               | 0.163325                 | 0.2138882       | 0.896064                         |

**Table S1. Cont.**

| Taxonomic rank | Taxa*               | Top organisms <sup>†</sup>                      | Taxa represented <sup>‡</sup>  | Counts <sup>§</sup> | Prop total <sup>¶</sup> | Prop top hits <sup>**</sup> | Average S <sub>ab</sub> score <sup>††</sup> |
|----------------|---------------------|-------------------------------------------------|--------------------------------|---------------------|-------------------------|-----------------------------|---------------------------------------------|
|                |                     | Lactococcus lactis subsp. lactis; RO6; AF515224 | Lactococcus                    | 4,762               | 0.11905                 | 0.1559062                   | 0.9152703                                   |
| Genus          | <i>Roseburia</i>    | Uncultured bacterium; RL184_aao65g01; DQ809900  | Roseburia                      | <b>30,544</b>       | <b>0.7636</b>           |                             |                                             |
|                |                     | Uncultured bacterium; CRWD2_aaa03d03; EU503700  | Roseburia                      | 9,117               | 0.227925                | 0.4072635                   | 0.8149241                                   |
|                |                     | Uncultured bacterium; CRWD5_aaa04f02; EU504227  | Unclassified Lachnospiraceae   | 8,557               | 0.213925                | 0.3822478                   | 0.8707943                                   |
|                |                     | Uncultured bacterium; K74N1_19e08; EU455153     | Unclassified Clostridiales     | 2,445               | 0.061125                | 0.10922                     | 0.9149681                                   |
|                |                     |                                                 |                                | <b>22,386</b>       | <b>0.55965</b>          |                             |                                             |
| Genus          | <i>Turicibacter</i> | Uncultured bacterium; control_7 d-F2; EF406422  | Turicibacter                   | 18,682              | 0.44481                 | 0.4727705                   | 0.8986114                                   |
|                |                     | Uncultured bacterium; infected_7 d-E1; EF406660 | Turicibacter                   | 17,816              | 0.42419                 | 0.4508553                   | 0.8995282                                   |
|                |                     | Uncultured bacterium; R-6524; FJ880085          | Turicibacter                   | 1,621               | 0.038595                | 0.0410214                   | 0.9036231                                   |
|                |                     | Uncultured bacterium; R-9107; FJ881096          | Turicibacter                   | 1,397               | 0.033262                | 0.0353528                   | 0.8997015                                   |
|                |                     |                                                 |                                | <b>39,516</b>       | <b>0.940857</b>         |                             |                                             |
| Order          | Coriobacteriales    | Uncultured bacterium; C18_f09_1; EF614565       | Unclassified Coriobacteriaceae | 2,951               | 0.210786                | 0.4407767                   | 0.8278333                                   |
|                |                     | Uncultured bacterium; MD2_aap35a10; EU508535    | Asaccharobacter                | 1,520               | 0.108571                | 0.2270351                   | 0.9184368                                   |
|                |                     | Coriobacteriaceae bacterium B7; DQ789120        | Unclassified Coriobacteriaceae | 1,201               | 0.085786                | 0.1793876                   | 0.9162223                                   |
|                |                     | Uncultured bacterium; SWPT20_aaa03a06; EF097741 | Unclassified Coriobacteriaceae | 1,023               | 0.073071                | 0.1528006                   | 0.9142815                                   |
|                |                     |                                                 |                                | <b>6,695</b>        | <b>0.478214</b>         |                             |                                             |
| Family         | Coriobacteriaceae   | Uncultured bacterium; C18_f09_1; EF614565       | Unclassified Coriobacteriaceae | 2,951               | 0.210786                | 0.4407767                   | 0.8278333                                   |
|                |                     | Uncultured bacterium; MD2_aap35a10; EU508535    | Asaccharobacter                | 1,520               | 0.108571                | 0.2270351                   | 0.9184368                                   |
|                |                     | Coriobacteriaceae bacterium B7; DQ789120        | Unclassified Coriobacteriaceae | 1,201               | 0.085786                | 0.1793876                   | 0.9162223                                   |
|                |                     | Uncultured bacterium; SWPT20_aaa03a06; EF097741 | Unclassified Coriobacteriaceae | 1,023               | 0.073071                | 0.1528006                   | 0.9142815                                   |
|                |                     |                                                 |                                | <b>6,695</b>        | <b>0.478214</b>         |                             |                                             |

\*All sequences from respective taxa assigned by CLASSIFIER were extracted. At least 40,000 random sequences were selected from each taxon and analyzed by RDP SEQMATCH. Taxa with fewer than 40,000 sequences were analyzed to completion.

<sup>†</sup>Top four bacteria with the most sequence matches to the RDP SeqMatch database for the given taxa.

<sup>‡</sup>The lowest taxonomic rank assigned by RDP SeqMatch for the given top organism.

<sup>§</sup>The number of matches to the database for the given top organism.

<sup>¶</sup>The proportion of sequences matching the given top organism divided by the total number of sequences pooled for analysis of the given taxa.

<sup>\*\*</sup>The proportion of the sequences matching the given top organism divided by the compiled amount of sequences making up all four top organisms for the given taxa.

<sup>††</sup>The average of RDP SeqMatch score (S<sub>ab</sub>). The S<sub>ab</sub> score is the number of (unique) 7-base oligomers shared between the query sequence and a given RDP sequence divided by the lowest number of unique oligos in either of the two sequences.

<sup>‡‡</sup>The total number of sequences pooled for RDP SeqMatch analysis for the given taxa.

**Table S2. Descriptive statistics for CMM traits measured in the G<sub>4</sub> population**

|           |                                             | Average* | SD       | Min      | Max      |
|-----------|---------------------------------------------|----------|----------|----------|----------|
| Phylum    | Actinobacteria                              | -2.67739 | 0.590533 | -4.39794 | -0.39324 |
| Class     | Actinobacteria                              | -2.67739 | 0.590533 | -4.39794 | -0.39324 |
| Subclass  | Coriobacteridae                             | -2.94055 | 0.584882 | -4.39794 | -0.54654 |
| Order     | Coriobacteriales                            | -2.94055 | 0.584882 | -4.39794 | -0.54654 |
| Suborder  | Coriobacterineae                            | -2.94055 | 0.584882 | -4.39794 | -0.54654 |
| Family    | Coriobacteriaceae                           | -2.94055 | 0.584882 | -4.39794 | -0.54654 |
| Subclass  | Actinobacteridae                            | -3.28907 | 0.685807 | -4.65758 | -0.39482 |
| Phylum    | Bacteroidetes                               | -0.64014 | 0.322578 | -2.21247 | -0.07597 |
| Class     | Flavobacteria                               | -3.24884 | 0.768164 | -4.63827 | -1.20137 |
| Order     | Flavobacteriales                            | -3.24884 | 0.768164 | -4.63827 | -1.20137 |
| Family    | Flavobacteriaceae                           | -3.24962 | 0.768473 | -4.63827 | -1.20137 |
| Class     | Bacteroidetes                               | -0.86399 | 0.340153 | -2.55486 | -0.30995 |
| Order     | Bacteroidales                               | -0.86399 | 0.340153 | -2.55486 | -0.30995 |
| Family    | Rikenellaceae                               | -1.45665 | 0.361402 | -2.86902 | -0.78168 |
| Genus     | <i>Odoribacter</i>                          | -2.69635 | 0.658767 | -4.55284 | -1.61057 |
| Genus     | <i>Alistipes</i>                            | -1.82236 | 0.403583 | -3.16052 | -0.96128 |
| Genus     | <i>Rikenella</i>                            | -3.0305  | 0.75621  | -4.55284 | -1.60478 |
| Family    | Bacteroidaceae                              | -1.81256 | 0.524582 | -4.25181 | -0.56101 |
| Genus     | <i>Bacteroides</i>                          | -1.8127  | 0.524608 | -4.25181 | -0.56101 |
| Family    | Porphyromonadaceae                          | -1.83477 | 0.483651 | -4.25181 | -0.69437 |
| Genus     | <i>Parabacteroides</i>                      | -1.83713 | 0.483785 | -4.25181 | -0.69497 |
| Phylum    | Proteobacteria                              | -1.29749 | 0.441019 | -2.74642 | -0.19835 |
| Class     | Epsilonproteobacteria                       | -2.12995 | 0.931753 | -4.65758 | -0.50796 |
| Order     | Campylobacterales                           | -2.12999 | 0.931747 | -4.65758 | -0.50796 |
| Family    | Helicobacteraceae                           | -2.14262 | 0.94777  | -4.65758 | -0.50813 |
| Genus     | <i>Helicobacter</i>                         | -2.15126 | 0.950455 | -4.65758 | -0.51233 |
| Class     | Deltaproteobacteria                         | -2.18371 | 0.669213 | -4.21467 | -0.81547 |
| Class     | Alphaproteobacteria                         | -2.79909 | 0.689063 | -4.60206 | -1.0188  |
| Order     | Rhizobiales                                 | -3.16046 | 0.793923 | -4.65758 | -1.25349 |
| Class     | Gammaproteobacteria                         | -2.38611 | 0.639983 | -4.23657 | -0.21968 |
| Order     | Pseudomonadales                             | -2.82208 | 0.638174 | -4.45593 | -0.21992 |
| Order     | Enterobacteriales                           | -2.83163 | 0.598018 | -4.38722 | -1.44615 |
| Family    | Enterobacteriaceae                          | -2.83163 | 0.598018 | -4.38722 | -1.44615 |
| Class     | Betaproteobacteria                          | -2.2471  | 0.633134 | -4.05552 | -0.41858 |
| Order     | Burkholderiales                             | -2.38423 | 0.667937 | -4.05552 | -0.42322 |
| Family    | Comamonadaceae                              | -2.4195  | 0.676075 | -4.05552 | -0.43046 |
| Genus     | <i>Variovorax</i>                           | -2.66522 | 0.751411 | -4.25181 | -0.43876 |
| Phylum    | Firmicutes                                  | -0.27565 | 0.143062 | -1.06802 | -0.0228  |
| Class     | Bacilli                                     | -1.20876 | 0.500503 | -2.47638 | -0.10353 |
| Order     | Lactobacillales                             | -1.23337 | 0.502172 | -2.5085  | -0.10555 |
| Family    | Lactobacillaceae                            | -1.73651 | 0.687982 | -4.08619 | -0.10924 |
| Genus     | <i>Lactobacillus</i>                        | -1.74217 | 0.687414 | -4.08619 | -0.11181 |
| Family    | Leuconostocaceae                            | -2.67244 | 0.558744 | -4.45593 | -1.14704 |
| Genus     | <i>Weissella</i>                            | -2.80507 | 0.626531 | -4.65758 | -1.21328 |
| Family    | Streptococcaceae                            | -1.73707 | 0.5654   | -3.28651 | -0.28054 |
| Genus     | <i>Lactococcus</i>                          | -1.75409 | 0.572448 | -3.28651 | -0.28122 |
| Order     | Bacillales                                  | -2.96039 | 0.641711 | -4.36653 | -0.69596 |
| Class     | Erysipelotrichi                             | -2.41441 | 0.808503 | -4.27572 | -0.42666 |
| Order     | Erysipelotrichales                          | -2.41441 | 0.808503 | -4.27572 | -0.42666 |
| Family    | Erysipelotrichaceae                         | -2.41441 | 0.808503 | -4.27572 | -0.42666 |
| Genus     | <i>Turicibacter</i>                         | -2.69515 | 0.992398 | -4.55284 | -0.42707 |
| Class     | Clostridia                                  | -0.42739 | 0.192067 | -1.52896 | -0.07883 |
| Order     | Clostridiales                               | -0.43079 | 0.192643 | -1.53304 | -0.08154 |
| Family    | Lachnospiraceae                             | -0.70714 | 0.232744 | -2.04648 | -0.26048 |
| Genus     | <i>Lachnobacterium</i>                      | -3.35505 | 0.842755 | -4.5376  | -0.92087 |
| Genus     | <i>Dorea</i>                                | -2.38523 | 0.446171 | -4.18709 | -1.11065 |
| Genus     | <i>Lachnospiraceae Incertae Sedis</i>       | -2.55034 | 0.383489 | -4.25964 | -1.68721 |
| Genus     | <i>Roseburia</i>                            | -2.89953 | 0.590418 | -4.65758 | -0.5072  |
| Family    | Peptostreptococcaceae                       | -2.84529 | 0.996391 | -4.58503 | -0.27802 |
| Genus     | <i>Peptostreptococcaceae Incertae Sedis</i> | -2.85821 | 0.998041 | -4.58503 | -0.28497 |
| Family    | Ruminococcaceae                             | -1.5107  | 0.244235 | -2.61386 | -0.62938 |
| Family    | Clostridiaceae                              | -3.44843 | 0.821475 | -4.72125 | -0.70714 |
| Subfamily | Clostridiaceae 1                            | -3.4492  | 0.821532 | -4.72125 | -0.70714 |
| Genus     | <i>Clostridium</i>                          | -3.55616 | 0.770174 | -4.72125 | -0.86786 |

\*Prop values of 0 were replaced with 0.5/total reads. and all Prop values were log<sub>10</sub>-transformed for descriptive statistics.

**Table S3. Mixed-model analysis of CMM traits with an across-taxa FDR < 0.05**

| Rank      | Taxon                                       | Source of variation* | P value <sup>†</sup> | FDR <sup>‡</sup> |
|-----------|---------------------------------------------|----------------------|----------------------|------------------|
| Phylum    | Proteobacteria                              | Parent of origin     | 0.0022               | 0.017925         |
| Class     | Deltaproteobacteria                         | Parent of origin     | <0.0001              | 0.000453         |
| Class     | Epsilonproteobacteria                       | Parent of origin     | <0.0001              | 0.000453         |
| Order     | Campylobacteriales                          | Parent of origin     | <0.0001              | 0.000453         |
| Family    | Clostridiaceae                              | Parent of origin     | 0.0112               | 0.049683         |
| Family    | Helicobacteraceae                           | Parent of origin     | <0.0001              | 0.000453         |
| Family    | Peptostreptococcaceae                       | Parent of origin     | 0.0115               | 0.049683         |
| Family    | Ruminococcaceae                             | Parent of origin     | 0.0006               | 0.005208         |
| Subfamily | Clostridiaceae 1                            | Parent of origin     | 0.0111               | 0.049683         |
| Genus     | <i>Dorea</i>                                | Parent of origin     | 0.0025               | 0.018041         |
| Genus     | <i>Helicobacter</i>                         | Parent of origin     | <0.0001              | 0.000453         |
| Genus     | <i>Lachnobacterium</i>                      | Parent of origin     | 0.006                | 0.035161         |
| Genus     | <i>Lachnospiraceae Incertae sedis</i>       | Parent of origin     | 0.0005               | 0.005208         |
| Genus     | <i>Peptostreptococcaceae Incertae sedis</i> | Parent of origin     | 0.0116               | 0.049683         |
| Genus     | <i>Rikenella</i>                            | Parent of origin     | 0.0049               | 0.031611         |
| Phylum    | Actinobacteria                              | Sex                  | 0.0024               | 0.016972         |
| Class     | Actinobacteria                              | Sex                  | 0.0024               | 0.016972         |
| Class     | Epsilonproteobacteria                       | Sex                  | 0.0073               | 0.033396         |
| Class     | Erysipelotrichi                             | Sex                  | 0.0068               | 0.033396         |
| Subclass  | Coriobacteridae                             | Sex                  | 0.0006               | 0.006676         |
| Order     | Bacillales                                  | Sex                  | 0.0108               | 0.04052          |
| Order     | Campylobacteriales                          | Sex                  | 0.0073               | 0.033396         |
| Order     | Coriobacteriales                            | Sex                  | 0.0006               | 0.006676         |
| Order     | Erysipelotrichales                          | Sex                  | 0.0068               | 0.033396         |
| Suborder  | Coriobacterineae                            | Sex                  | 0.0006               | 0.006676         |
| Family    | Coriobacteriaceae                           | Sex                  | 0.0006               | 0.006676         |
| Family    | Erysipelotrichaceae                         | Sex                  | 0.0068               | 0.033396         |
| Family    | Helicobacteraceae                           | Sex                  | 0.0092               | 0.036682         |
| Family    | Peptostreptococcaceae                       | Sex                  | <0.0001              | 0.002721         |
| Genus     | <i>Helicobacter</i>                         | Sex                  | 0.0082               | 0.035158         |
| Genus     | Peptostreptococcaceae Incertae sedis        | Sex                  | <0.0001              | 0.002721         |
| Genus     | <i>Turicibacter</i>                         | Sex                  | 0.0015               | 0.013717         |
| Phylum    | Actinobacteria                              | Cohort               | <0.0001              | 0.000025         |
| Phylum    | Bacteroidetes                               | Cohort               | <0.0001              | 0                |
| Phylum    | Firmicutes                                  | Cohort               | <0.0001              | 0.000025         |
| Phylum    | Proteobacteria                              | Cohort               | <0.0001              | 0.000121         |
| Subclass  | Actinobacteridae                            | Cohort               | 0.0013               | 0.002488         |
| Subclass  | Coriobacteridae                             | Cohort               | <0.0001              | 0.00002          |
| Order     | Enterobacteriales                           | Cohort               | <0.0001              | 0.000001         |
| Order     | Flavobacteriales                            | Cohort               | 0.0002               | 0.000369         |
| Order     | Lactobacillales                             | Cohort               | 0.0007               | 0.001321         |
| Order     | Pseudomonadales                             | Cohort               | <0.0001              | 0.000063         |
| Order     | Rhizobiales                                 | Cohort               | <0.0001              | 0.000197         |
| Suborder  | Coriobacterineae                            | Cohort               | <0.0001              | 0.00002          |
| Class     | Bacteroidetes                               | Dam                  | 0.0004               | 0.011485         |
| Order     | Bacteroidales                               | Dam                  | 0.0004               | 0.011485         |
| Phylum    | Actinobacteria                              | Litter               | 0.0009               | 0.004262         |
| Phylum    | Proteobacteria                              | Litter               | 0.0017               | 0.006141         |
| Class     | Actinobacteria                              | Litter               | 0.0009               | 0.004262         |
| Class     | Deltaproteobacteria                         | Litter               | 0.0104               | 0.025511         |
| Class     | Epsilonproteobacteria                       | Litter               | <0.0001              | 0.001275         |
| Class     | Erysipelotrichi                             | Litter               | 0.0001               | 0.001275         |
| Class     | Flavobacteria                               | Litter               | 0.0004               | 0.002262         |
| Subclass  | Actinobacteridae                            | Litter               | 0.0017               | 0.006141         |
| Subclass  | Coriobacteridae                             | Litter               | 0.0019               | 0.006141         |
| Order     | Bacillales                                  | Litter               | 0.011                | 0.026008         |
| Order     | Burkholderiales                             | Litter               | 0.0064               | 0.016302         |
| Order     | Campylobacteriales                          | Litter               | <0.0001              | 0.001275         |
| Order     | Coriobacteriales                            | Litter               | 0.0019               | 0.006141         |
| Order     | Erysipelotrichales                          | Litter               | 0.0001               | 0.001275         |
| Order     | Flavobacteriales                            | Litter               | 0.0004               | 0.002262         |
| Order     | Pseudomonadales                             | Litter               | 0.0155               | 0.03545          |
| Order     | Rhizobiales                                 | Litter               | 0.0007               | 0.003648         |

Table S3. Cont.

| Rank      | Taxon                  | Source of variation* | P value <sup>†</sup> | FDR <sup>‡</sup> |
|-----------|------------------------|----------------------|----------------------|------------------|
| Suborder  | Coriobacterineae       | Litter               | 0.0019               | 0.006141         |
| Family    | Clostridiaceae         | Litter               | 0.0056               | 0.01482          |
| Family    | Comamonadaceae         | Litter               | 0.0164               | 0.036246         |
| Family    | Coriobacteriaceae      | Litter               | 0.0019               | 0.006141         |
| Family    | Erysipelotrichaceae    | Litter               | 0.0001               | 0.001275         |
| Family    | Flavobacteriaceae      | Litter               | 0.0004               | 0.002262         |
| Family    | Helicobacteraceae      | Litter               | 0.0001               | 0.001275         |
| Subfamily | Clostridiaceae 1       | Litter               | 0.0055               | 0.01482          |
| Genus     | <i>Clostridium</i>     | Litter               | 0.0031               | 0.009582         |
| Genus     | <i>Dorea</i>           | Litter               | 0.0198               | 0.042126         |
| Genus     | <i>Helicobacter</i>    | Litter               | 0.0002               | 0.001275         |
| Genus     | <i>Lachnobacterium</i> | Litter               | 0.0055               | 0.01482          |
| Genus     | <i>Turicibacter</i>    | Litter               | 0.0002               | 0.001275         |
| Genus     | <i>Weissella</i>       | Litter               | 0.0204               | 0.042126         |

\*Abbreviated notation for sources of variation: cohort for cohort(parent of origin), dam for dam(parent of origin), and litter for litter (parent of origin\*cohort\*dam).

<sup>†</sup>The P value is the probability of obtaining a larger F value in the individual taxon analysis.

<sup>‡</sup>FDR is the across-taxa false discovery rate adjusted P value calculated separately for each source of variation.



**Table S4. REML estimated variance components of CMM traits**

| Rank      | Taxon                                       | Proportion of total variance* |         |         |          | Variance† |         |         |          |
|-----------|---------------------------------------------|-------------------------------|---------|---------|----------|-----------|---------|---------|----------|
|           |                                             | Cohort                        | Family  | Litter  | Residual | Cohort    | Family  | Litter  | Residual |
| Phylum    | Actinobacteria                              | 0.39788                       | 0       | 0.08413 | 0.51798  | 0.13479   | 0       | 0.0285  | 0.1755   |
| Phylum    | Bacteroidetes                               | 0.27611                       | 0.06455 | 0       | 0.65935  | 0.03189   | 0.00745 | 0       | 0.07615  |
| Phylum    | Firmicutes                                  | 0.32759                       | 0.06585 | 0       | 0.60656  | 0.00601   | 0.00121 | 0       | 0.01114  |
| Phylum    | Proteobacteria                              | 0.41389                       | 0.04939 | 0.08617 | 0.45055  | 0.05838   | 0.00697 | 0.01215 | 0.06355  |
| Class     | Actinobacteria                              | 0.39788                       | 0       | 0.08413 | 0.51798  | 0.13479   | 0       | 0.0285  | 0.1755   |
| Class     | Alphaproteobacteria                         | 0.38916                       | 0.00749 | 0.04531 | 0.55804  | 0.16557   | 0.00319 | 0.01928 | 0.2374   |
| Class     | Bacilli                                     | 0.24173                       | 0.04747 | 0.01526 | 0.69553  | 0.06647   | 0.01305 | 0.0042  | 0.1913   |
| Class     | Bacteroidetes                               | 0.26202                       | 0.07093 | 0       | 0.66705  | 0.03386   | 0.00917 | 0       | 0.08619  |
| Class     | Betaproteobacteria                          | 0.25345                       | 0.01973 | 0.03592 | 0.6909   | 0.07182   | 0.00559 | 0.01018 | 0.1958   |
| Class     | Clostridia                                  | 0.05253                       | 0.04713 | 0       | 0.90035  | 0.00187   | 0.00167 | 0       | 0.03199  |
| Class     | Deltaproteobacteria                         | 0.18166                       | 0       | 0.1135  | 0.70485  | 0.0465    | 0       | 0.02905 | 0.1804   |
| Class     | Epsilonproteobacteria                       | 0.17242                       | 0.16151 | 0.16859 | 0.49747  | 0.11118   | 0.10414 | 0.10871 | 0.3208   |
| Class     | Erysipelotrichi                             | 0.1029                        | 0.04101 | 0.12422 | 0.73187  | 0.07042   | 0.02807 | 0.08501 | 0.5009   |
| Class     | Flavobacteria                               | 0.36772                       | 0       | 0.08908 | 0.54319  | 0.17613   | 0       | 0.04267 | 0.2602   |
| Class     | Gammaproteobacteria                         | 0.46878                       | 0.01188 | 0.05323 | 0.46612  | 0.19338   | 0.0049  | 0.02196 | 0.1923   |
| Order     | Bacillales                                  | 0.21766                       | 0.03951 | 0.08784 | 0.65499  | 0.08841   | 0.01605 | 0.03568 | 0.266    |
| Order     | Bacteroidales                               | 0.26202                       | 0.07093 | 0       | 0.66705  | 0.03386   | 0.00917 | 0       | 0.08619  |
| Order     | Burkholderiales                             | 0.27349                       | 0       | 0.0543  | 0.67221  | 0.08385   | 0       | 0.01665 | 0.2061   |
| Order     | Clostridiales                               | 0.05309                       | 0.04697 | 0       | 0.89994  | 0.0019    | 0.00168 | 0       | 0.03214  |
| Order     | Coriobacteriales                            | 0.42787                       | 0       | 0.08143 | 0.49069  | 0.15041   | 0       | 0.02863 | 0.1725   |
| Order     | Enterobacteriales                           | 0.41728                       | 0.00428 | 0.05511 | 0.52333  | 0.14701   | 0.00151 | 0.01941 | 0.1844   |
| Order     | Erysipelotrichales                          | 0.1029                        | 0.04101 | 0.12422 | 0.73187  | 0.07042   | 0.02807 | 0.08501 | 0.5009   |
| Order     | Flavobacteriales                            | 0.36772                       | 0       | 0.08908 | 0.54319  | 0.17613   | 0       | 0.04267 | 0.2602   |
| Order     | Lactobacillales                             | 0.23713                       | 0.04833 | 0.01495 | 0.6996   | 0.06562   | 0.01337 | 0.00414 | 0.1936   |
| Order     | Pseudomonadales                             | 0.35992                       | 0.00417 | 0.06987 | 0.56604  | 0.1392    | 0.00161 | 0.02702 | 0.2189   |
| Order     | Rhizobiales                                 | 0.42862                       | 0       | 0.07539 | 0.496    | 0.22995   | 0       | 0.04044 | 0.2661   |
| Suborder  | Coriobacterineae                            | 0.42787                       | 0       | 0.08143 | 0.49069  | 0.15041   | 0       | 0.02863 | 0.1725   |
| Family    | Bacteroidaceae                              | 0.30932                       | 0.00968 | 0.06251 | 0.6185   | 0.08616   | 0.0027  | 0.01741 | 0.1723   |
| Family    | Clostridiaceae                              | 0.21729                       | 0.02276 | 0.08559 | 0.67436  | 0.144     | 0.01509 | 0.05672 | 0.4469   |
| Family    | Comamonadaceae                              | 0.27078                       | 0       | 0.04536 | 0.68385  | 0.08496   | 0       | 0.01423 | 0.2146   |
| Family    | Coriobacteriaceae                           | 0.42787                       | 0       | 0.08143 | 0.49069  | 0.15041   | 0       | 0.02863 | 0.1725   |
| Family    | Enterobacteriaceae                          | 0.41728                       | 0.00428 | 0.05511 | 0.52333  | 0.14701   | 0.00151 | 0.01941 | 0.1844   |
| Family    | Erysipelotrichaceae                         | 0.1029                        | 0.04101 | 0.12422 | 0.73187  | 0.07042   | 0.02807 | 0.08501 | 0.5009   |
| Family    | Flavobacteriaceae                           | 0.36838                       | 0       | 0.08826 | 0.54336  | 0.17655   | 0       | 0.0423  | 0.2604   |
| Family    | Helicobacteraceae                           | 0.14769                       | 0.17841 | 0.16148 | 0.51241  | 0.0982    | 0.11863 | 0.10737 | 0.3407   |
| Family    | Lachnospiraceae                             | 0.06745                       | 0.03029 | 0.01847 | 0.88379  | 0.00366   | 0.00164 | 0.001   | 0.04789  |
| Family    | Lactobacillaceae                            | 0.08002                       | 0.07373 | 0       | 0.84625  | 0.0404    | 0.03722 | 0       | 0.4273   |
| Family    | Leuconostocaceae                            | 0.47525                       | 0.00714 | 0.06711 | 0.45051  | 0.15215   | 0.00229 | 0.02148 | 0.1442   |
| Family    | Peptostreptococcaceae                       | 0.16267                       | 0.01352 | 0.05315 | 0.77067  | 0.15868   | 0.01318 | 0.05184 | 0.7518   |
| Family    | Porphyromonadaceae                          | 0.19482                       | 0.09877 | 0.01168 | 0.69472  | 0.05108   | 0.0259  | 0.00306 | 0.1822   |
| Family    | Rikenellaceae                               | 0.26116                       | 0.05894 | 0       | 0.67991  | 0.03695   | 0.00834 | 0       | 0.09619  |
| Family    | Ruminococcaceae                             | 0.08045                       | 0.05935 | 0       | 0.8602   | 0.00437   | 0.00322 | 0       | 0.04669  |
| Family    | Streptococcaceae                            | 0.46151                       | 0.02891 | 0.05591 | 0.45368  | 0.14802   | 0.00927 | 0.01793 | 0.1455   |
| Subfamily | Clostridiaceae 1                            | 0.21721                       | 0.02305 | 0.08595 | 0.67379  | 0.14392   | 0.01527 | 0.05695 | 0.4465   |
| Genus     | <i>Alistipes</i>                            | 0.30995                       | 0       | 0.05017 | 0.63988  | 0.05545   | 0       | 0.00898 | 0.1145   |
| Genus     | <i>Bacteroides</i>                          | 0.30922                       | 0.00943 | 0.06259 | 0.61876  | 0.08614   | 0.00263 | 0.01744 | 0.1724   |
| Genus     | <i>Clostridium</i>                          | 0.22068                       | 0.01223 | 0.09866 | 0.66843  | 0.13105   | 0.00726 | 0.05859 | 0.3969   |
| Genus     | <i>Dorea</i>                                | 0.18903                       | 0.07916 | 0.07951 | 0.6523   | 0.03365   | 0.01409 | 0.01415 | 0.1161   |
| Genus     | <i>Helicobacter</i>                         | 0.15294                       | 0.17651 | 0.16352 | 0.50703  | 0.1031    | 0.11899 | 0.11023 | 0.3418   |
| Genus     | <i>Lachnobacterium</i>                      | 0.11745                       | 0.11622 | 0.08846 | 0.67787  | 0.0778    | 0.07698 | 0.05859 | 0.449    |
| Genus     | <i>Lachnospiraceae Incertae sedis</i>       | 0.08521                       | 0.10581 | 0       | 0.80897  | 0.01086   | 0.01349 | 0       | 0.1031   |
| Genus     | <i>Lactobacillus</i>                        | 0.07871                       | 0.07461 | 0       | 0.84668  | 0.03968   | 0.03762 | 0       | 0.4269   |
| Genus     | <i>Lactococcus</i>                          | 0.46108                       | 0.02927 | 0.0544  | 0.45525  | 0.15159   | 0.00962 | 0.01788 | 0.1497   |
| Genus     | <i>Odoribacter</i>                          | 0.13062                       | 0.02303 | 0.035   | 0.81134  | 0.06023   | 0.01062 | 0.01614 | 0.3741   |
| Genus     | <i>Parabacteroides</i>                      | 0.19493                       | 0.09813 | 0.0125  | 0.69444  | 0.0511    | 0.02572 | 0.00328 | 0.182    |
| Genus     | <i>Peptostreptococcaceae Incertae sedis</i> | 0.15946                       | 0.01438 | 0.05114 | 0.77502  | 0.1563    | 0.0141  | 0.05013 | 0.7597   |
| Genus     | <i>Rikenella</i>                            | 0.1678                        | 0.02807 | 0.05314 | 0.75099  | 0.08676   | 0.01452 | 0.02748 | 0.3883   |
| Genus     | <i>Roseburia</i>                            | 0.0487                        | 0.12158 | 0.08587 | 0.74385  | 0.01454   | 0.0363  | 0.02564 | 0.2221   |
| Genus     | <i>Turicibacter</i>                         | 0.09938                       | 0.04869 | 0.12768 | 0.72425  | 0.09663   | 0.04734 | 0.12415 | 0.7042   |
| Genus     | <i>Variovorax</i>                           | 0.33673                       | 0.00279 | 0.04756 | 0.61292  | 0.13608   | 0.00113 | 0.01922 | 0.2477   |
| Genus     | <i>Weissella</i>                            | 0.52388                       | 0.00223 | 0.0754  | 0.3985   | 0.1991    | 0.00085 | 0.02865 | 0.1514   |

\*Proportion of total variance is the variance divided by the sum of the cohort, family, litter, and residual variances.

†Variances were estimated using REML with a linear mixed model that included fixed effects for parent of origin and sex and random effects for cohort(parent of origin), family(parent of origin), and litter(parent of origin\*cohort\*family).

Table S5. QTL detected and respective statistics for Prop1 traits

| Trait    | Nearest marker                            | Chromosome  | Peak position, Mb | Naive LOD | GRAIP LOD* | 95% CI, Mb <sup>†</sup> | % Var <sup>‡</sup> | Additive $\pm$ SE <sup>§</sup> | Dominance $\pm$ SE <sup>§</sup> |                  |
|----------|-------------------------------------------|-------------|-------------------|-----------|------------|-------------------------|--------------------|--------------------------------|---------------------------------|------------------|
| Phylum   | Actinobacteria                            |             |                   |           |            |                         |                    |                                |                                 |                  |
| Subclass | Coriobacteridae                           | JAX00300375 | 10                | 119       | 7.2        | 3.9**                   | 104–123            | 5.7                            | 0.20 $\pm$ 0.03 <sup>¶</sup>    | -0.03 $\pm$ 0.05 |
| Order    | Coriobacteriales                          | JAX00300375 | 10                | 119       | 7.1        | 4.0**                   | 105–122            | 5.7                            | 0.20 $\pm$ 0.03 <sup>¶</sup>    | -0.03 $\pm$ 0.05 |
| Suborder | Coriobacterineae                          | JAX00300375 | 10                | 119       | 7.0        | 3.9**                   | 104–123            | 5.7                            | 0.20 $\pm$ 0.03 <sup>¶</sup>    | -0.03 $\pm$ 0.05 |
| Family   | Coriobacteriaceae                         | JAX00300375 | 10                | 119       | 7.3        | 4.2**                   | 106–122            | 5.7                            | 0.20 $\pm$ 0.03 <sup>¶</sup>    | -0.03 $\pm$ 0.05 |
| Phylum   | Proteobacteria                            | JAX00139228 | 6                 | 28        | 8.6        | 4.1**                   | -40                | 1.5                            | -0.05 $\pm$ 0.02                | 0.08 $\pm$ 0.03  |
|          |                                           | JAX00666793 | 8                 | 43        | 8.6        | 4.1**                   | 33–63              | 3.2                            | -0.08 $\pm$ 0.02                | 0.12 $\pm$ 0.03  |
| Class    | Epsilonproteobacteria                     | JAX00603343 | 6                 | 13        | 9.2        | 4.7**                   | -39                | 1.7                            | -0.03 $\pm$ 0.05                | 0.24 $\pm$ 0.07  |
| Order    | Campylobacteriales                        | JAX00603343 | 6                 | 13        | 9.2        | 4.7**                   | -39                | 1.7                            | -0.03 $\pm$ 0.05                | 0.24 $\pm$ 0.07  |
| Family   | Helicobacteraceae                         | JAX00603343 | 6                 | 13        | 8.7        | 4.4**                   | -39                | 1.7                            | -0.03 $\pm$ 0.05                | 0.24 $\pm$ 0.07  |
| Genus    | <i>Helicobacter</i>                       | JAX00603343 | 6                 | 13        | 8.8        | 4.4**                   | -39                | 1.6                            | -0.02 $\pm$ 0.05                | 0.24 $\pm$ 0.08  |
| Class    | Deltaproteobacteria                       | JAX00480903 | 19                | 56        | 5.1        | 3.9**                   | 54–                | 2.5                            | -0.10 $\pm$ 0.04                | 0.17 $\pm$ 0.05  |
| Class    | Gammaproteobacteria                       | JAX00707462 | 9                 | 119       | 6.2        | 3.6                     | 117–               | 4.0                            | -0.14 $\pm$ 0.04                | 0.19 $\pm$ 0.05  |
| Order    | Pseudomonadales                           | JAX00707462 | 9                 | 119       | 6.8        | 3.8                     | 117–               | 4.4                            | -0.14 $\pm$ 0.04                | 0.21 $\pm$ 0.05  |
| Class    | Betaproteobacteria                        | JAX00633165 | 7                 | 19        | 8.6        | 4.7**                   | 15–29              | 6.3                            | -0.22 $\pm$ 0.03 <sup>¶</sup>   | -0.10 $\pm$ 0.05 |
| Order    | Burkholderiales                           | JAX00633165 | 7                 | 19        | 10.7       | 4.7**                   | 14–33              | 7.9                            | -0.26 $\pm$ 0.04 <sup>¶</sup>   | -0.11 $\pm$ 0.05 |
| Family   | Comamonadaceae                            | JAX00633165 | 7                 | 19        | 10.8       | 4.7**                   | 13–34              | 7.9                            | -0.26 $\pm$ 0.04 <sup>¶</sup>   | -0.12 $\pm$ 0.05 |
| Genus    | <i>Variovorax</i>                         | JAX00633165 | 7                 | 19        | 9.7        | 4.7**                   | 14–28              | 7.2                            | -0.27 $\pm$ 0.04 <sup>¶</sup>   | -0.16 $\pm$ 0.06 |
| Phylum   | Firmicutes                                |             |                   |           |            |                         |                    |                                |                                 |                  |
| Species  | <i>L.johnsonii</i> /L.gasseri<br>97%      | JAX00641805 | 7                 | 66        | 6.8        | 4.7**                   | 47–71              | 4.7                            | -0.27 $\pm$ 0.05 <sup>¶</sup>   | -0.11 $\pm$ 0.07 |
|          |                                           | JAX00387018 | 14                | 93        | 5.8        | 4.7**                   | 86–103             | 3.9                            | -0.23 $\pm$ 0.05 <sup>¶</sup>   | -0.16 $\pm$ 0.07 |
| Family   | Streptococcaceae                          | JAX00022058 | 10                | 107       | 8.0        | 4.7**                   | 101–111            | 7.0                            | 0.21 $\pm$ 0.03 <sup>¶</sup>    | -0.05 $\pm$ 0.04 |
| Genus    | <i>Lactococcus</i>                        | JAX00022058 | 10                | 107       | 8.0        | 4.7**                   | 100–111            | 7.0                            | 0.21 $\pm$ 0.03 <sup>¶</sup>    | -0.05 $\pm$ 0.05 |
| Class    | Erysipelotrichi                           | JAX00643377 | 7                 | 73        | 6.4        | 4.0**                   | 65–88              | 5.0                            | -0.24 $\pm$ 0.04 <sup>¶</sup>   | 0.03 $\pm$ 0.06  |
| Order    | Erysipelotrichales                        | JAX00643377 | 7                 | 73        | 6.5        | 4.2**                   | 67–87              | 5.0                            | -0.24 $\pm$ 0.04 <sup>¶</sup>   | 0.03 $\pm$ 0.06  |
| Family   | Erysipelotrichaceae                       | JAX00643377 | 7                 | 73        | 6.5        | 4.0**                   | 66–88              | 5.0                            | -0.24 $\pm$ 0.04 <sup>¶</sup>   | 0.03 $\pm$ 0.06  |
| Genus    | <i>Turicibacter</i>                       | JAX00643377 | 7                 | 73        | 7.1        | 4.6**                   | 71–88              | 5.3                            | -0.30 $\pm$ 0.05 <sup>¶</sup>   | 0.09 $\pm$ 0.08  |
| Family   | Peptostreptococcaceae                     | JAX00010715 | 1                 | 148       | 5.8        | 3.8                     | 143–150            | 4.4                            | -0.25 $\pm$ 0.05 <sup>¶</sup>   | 0.16 $\pm$ 0.08  |
| Genus    | <i>Peptostreptococcaceae</i><br><i>IS</i> | JAX00010715 | 1                 | 148       | 5.7        | 3.7                     | 143–150            | 4.3                            | -0.25 $\pm$ 0.05 <sup>¶</sup>   | 0.17 $\pm$ 0.08  |
| Family   | Ruminococcaceae                           | JAX00327082 | 12                | 17        | 5.5        | 4.4**                   | -26                | 3.4                            | 0.06 $\pm$ 0.01 <sup>¶</sup>    | 0.04 $\pm$ 0.02  |
| Phylum   | Bacteroidetes                             |             |                   |           |            |                         |                    |                                |                                 |                  |
| Genus    | <i>Barnesiella</i>                        | JAX00005735 | 1                 | 80        | 10.7       | 4.7**                   | 63–139             | 9.0                            | -0.23 $\pm$ 0.03 <sup>¶</sup>   | 0.14 $\pm$ 0.05  |
|          |                                           | JAX00173791 | 9                 | 87        | 4.6        | 3.5                     | 72–104             | 3.4                            | -0.14 $\pm$ 0.04                | 0.14 $\pm$ 0.05  |

\*LOD exceeding the 95% ( $P = 0.05$ ,  $\text{LOD} \geq 3.9$ ) permutation threshold are denoted by \*\*; other QTL exceeded the 90% ( $P = 0.1$ ,  $\text{LOD} \geq 3.5$ ) threshold.

<sup>†</sup>Confidence intervals for QTL positions were obtained using a 1.0 LOD drop in Mb (relative to the GRAIP-permuted LOD score).

<sup>‡</sup>Percentage of phenotypic variance accounted for by the QTL effect.

<sup>§</sup>For additive and dominance effects: positive values indicate increasing effect of the HR allele or increasing effect of the heterozygote, respectively.

<sup>¶</sup>Indicates that additive and/or dominance effects were statistically significant at  $P < 0.05$ .

**Table S6. Genotype (C57BL/6J = BB; HR = AA) frequencies (% of total calls) at a given SNP location**

|          | Trait                            | SNP         | MMU | % of BB | % of BA | % of AA |
|----------|----------------------------------|-------------|-----|---------|---------|---------|
| Subclass | Coriobacteridae                  | JAX00300375 | 10  | 30.3    | 51.6    | 18.1    |
| Order    | Coriobacteriales                 | JAX00300375 | 10  | 30.3    | 51.6    | 18.1    |
| Suborder | Coriobacterineae                 | JAX00300375 | 10  | 30.3    | 51.6    | 18.1    |
| Family   | Coriobacteriaceae                | JAX00300375 | 10  | 30.3    | 51.6    | 18.1    |
| Genus    | <i>Odoribacter</i>               | JAX00005735 | 1   | 23.0    | 44.7    | 32.3    |
|          |                                  | JAX00173791 | 9   | 22.1    | 53.6    | 24.3    |
| Phylum   | Proteobacteria                   | JAX00139228 | 6   | 29.2    | 45.6    | 25.2    |
|          |                                  | JAX00666793 | 8   | 27.9    | 47.0    | 25.1    |
| Class    | Epsilonproteobacteria            | JAX00603343 | 6   | 32.3    | 45.4    | 22.2    |
| Order    | Campylobacterales                | JAX00603343 | 6   | 32.3    | 45.4    | 22.2    |
| Family   | Helicobacteraceae                | JAX00603343 | 6   | 32.3    | 45.4    | 22.2    |
| Genus    | <i>Helicobacter</i>              | JAX00603343 | 6   | 32.3    | 45.4    | 22.2    |
| Class    | Deltaproteobacteria              | JAX00480903 | 19  | 23.0    | 55.3    | 21.7    |
| Class    | Gammaproteobacteria              | JAX00707462 | 9   | 29.5    | 47.6    | 22.8    |
| Order    | Pseudomonadales                  | JAX00707462 | 9   | 29.5    | 47.6    | 22.8    |
| Class    | Betaproteobacteria               | JAX00633165 | 7   | 21.5    | 50.6    | 27.9    |
| Order    | Burkholderiales                  | JAX00633165 | 7   | 21.5    | 50.6    | 27.9    |
| Family   | Comamonadaceae                   | JAX00633165 | 7   | 21.5    | 50.6    | 27.9    |
| Genus    | <i>Variovorax</i>                | JAX00633165 | 7   | 21.5    | 50.6    | 27.9    |
| Family   | Streptococcaceae                 | JAX00022058 | 10  | 37.4    | 43.2    | 19.4    |
| Genus    | <i>Lactococcus</i>               | JAX00022058 | 10  | 37.4    | 43.2    | 19.4    |
| Species  | <i>L.johnsonii/L.gasseri</i> 97% | JAX00641805 | 7   | 24.7    | 48.1    | 27.3    |
|          |                                  | JAX00387018 | 14  | 23.9    | 54.0    | 22.1    |
| Class    | Erysipelotrichi                  | JAX00643377 | 7   | 26.9    | 45.2    | 27.9    |
| Order    | Erysipelotrichales               | JAX00643377 | 7   | 26.9    | 45.2    | 27.9    |
| Family   | Erysipelotrichaceae              | JAX00643377 | 7   | 26.9    | 45.2    | 27.9    |
| Genus    | <i>Turcibacter</i>               | JAX00643377 | 7   | 26.9    | 45.2    | 27.9    |
| Family   | Peptostreptococcaceae            | JAX00010715 | 1   | 29.8    | 41.3    | 28.9    |
| Genus    | <i>Peptostreptococcaceae IS</i>  | JAX00010715 | 1   | 29.8    | 41.3    | 28.9    |
| Family   | Ruminococcaceae                  | JAX00327082 | 12  | 22.8    | 48.2    | 29.0    |
